# Supplementary material for: Genomic Footprints of Selective Sweeps from Metabolic Resistance to Pyrethroids in African Malaria Vectors Are Driven by Scale up of Insecticide-Based Vector Control
Source: PLOS journal article supplement (doi:10.1371/journal.pgen.1006539), 2017-02-02
Supplement: S15 (10.1371/journal.pgen.1006539.s015) [file journal.pgen.1006539.s015]

**S7 Table. Descriptive statistics of POOLseq sequence read data for field-caught mosquitoes from Malawi.**

| Sample name       | Untrimmed reads | Trimmed reads | R1/R2 pairs <sup>1</sup> | R0 reads (%) <sup>2</sup> |
|-------------------|-----------------|---------------|--------------------------|---------------------------|
| MWI-Chikwawa-2014 | 91,499,782      | 90,976,162    | 45,240,390               | 495,382 (0.54%)           |
| MWI-Chikwawa-2002 | 100,946,514     | 100,344,549   | 49,951,213               | 442,123 (0.44%)           |

<sup>1</sup> Forward (R1) and reverse (R2) read pairs after trimming.

<sup>2</sup> Reads unpaired after trimming (% of total trimmed reads).
